# Supplementary material for: Oral Health-Related Quality of Life Changes in Patients with Dentofacial Deformities Class II and III after Orthognathic Surgery: A Systematic Review and Meta-Analysis
Source: MDPI journal article supplement (doi:10.3390/ijerph19041940), 2022-02-09
Supplement: s1 [file s1]

**Table S1.** Search Strategy for each Data Base.

| Data Base                                                | Search Strategy                                                                                                                                                                                                                                                                                                                                 |
|----------------------------------------------------------|-------------------------------------------------------------------------------------------------------------------------------------------------------------------------------------------------------------------------------------------------------------------------------------------------------------------------------------------------|
| PubMed                                                   | (((((orthognathic[Title/Abstract]) OR (dentofacial deformities[Title/Abstract])) OR (orthognathic surgery[Title/Abstract])) OR (dentofacial deformity[Title/Abstract])) OR (orthognathic surgery[MeSH Terms])) AND (((quality of life[Title/Abstract]) OR ("health related quality of life"[Title/Abstract])) OR (quality of life[MeSH Terms])) |
| Embase                                                   | ('quality of life' OR 'health related quality of life questionnaire') AND ('dentofacial deformity'/exp OR 'orthognathic surgery')                                                                                                                                                                                                               |
| Cochrane Central Register of Controlled Trials (CENTRAL) | ((dentofacial deformity):ti,ab,kw OR (orthognathic surgery):ti,ab,kw) AND ((quality of life) OR (health related quality f life):ti,ab,kw OR (oral health related quality of life):ti,ab,kw)                                                                                                                                                     |
| Scopus                                                   | ((TITLE-ABS-KEY (dentofacial AND deformity) OR TITLE-ABS-KEY (dentofacial AND deformities))) OR (TITLE-ABS-KEY (orthognathic AND surgery)) AND ((TITLE-ABS-KEY (quality AND of AND life ) OR TITLE-ABS-KEY (health AND related AND quality AND of AND life)))                                                                                   |
