# Supplementary material for: Oral Health-Related Quality of Life Changes in Patients with Dentofacial Deformities Class II and III after Orthognathic Surgery: A Systematic Review and Meta-Analysis
Source: MDPI journal article supplement (doi:10.3390/ijerph19041940), 2022-02-09

**Supplementary Figure S1.** Results of sensitivity analysis after excluding studies with weak methodological quality. Meta-analysis of the change from pre-surgery to 4 – 7 months after surgery in the OHIP-14 domain scores by type of dentofacial deformity.

## OHIP-14 Global Score

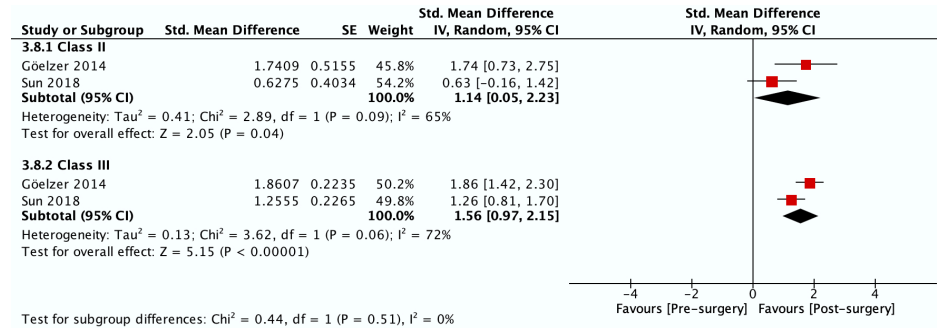

## OHIP 1 Functional limitation

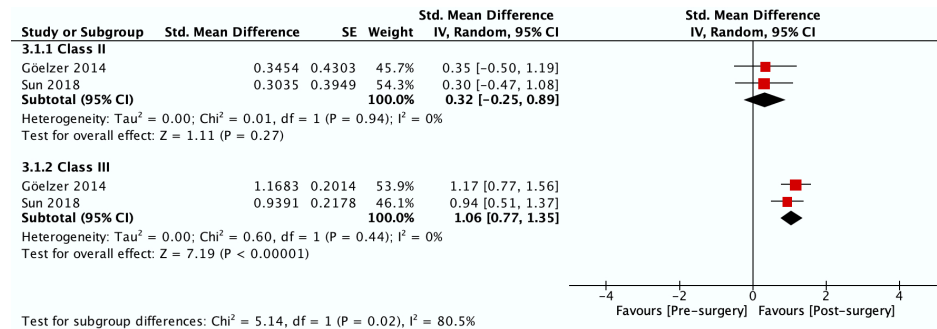

## OHIP 2 Physical pain

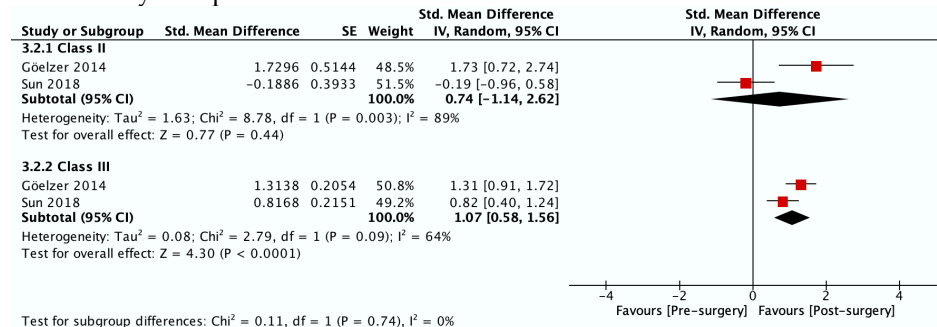

## OHIP 3 Psychological discomfort

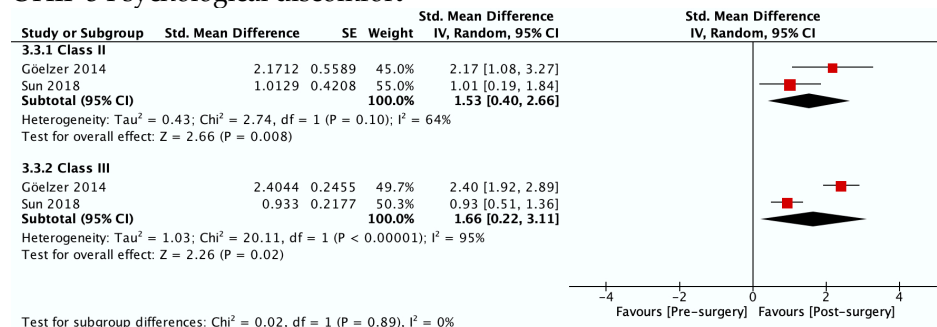

## OHIP 4 Physical disability

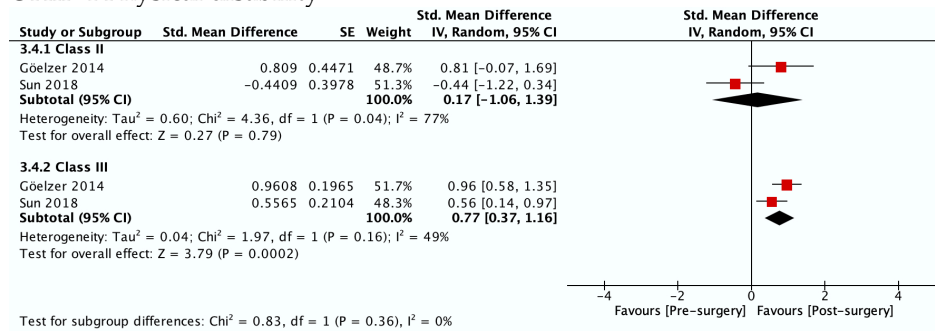

## OHIP 5 Psychological disability

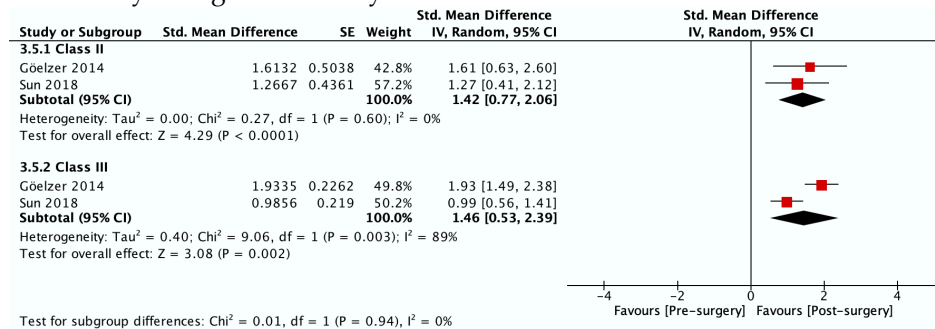

## OHIP 6 Social disability

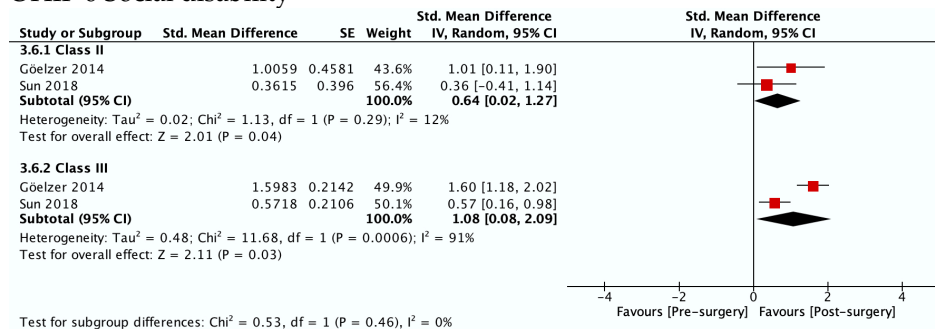

## OHIP 7 Handicap

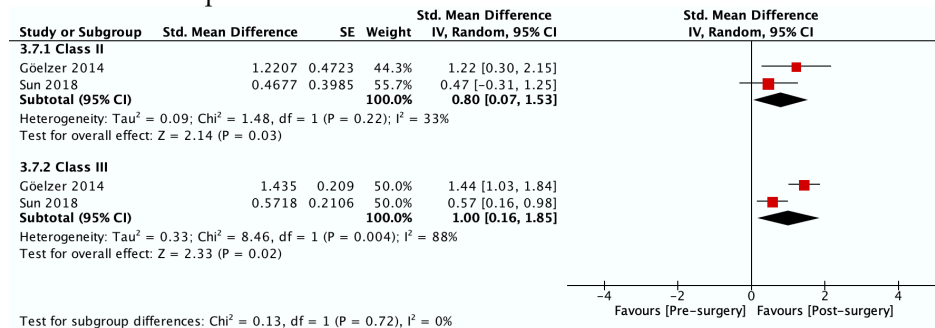

Supplement: s1 [file s1]
